# Supplementary material
Source: publisher figshare collection journal article supplement (https://acs.figshare.com/ndownloader/files/24736912)
Supplement: Supplementary file 1 [file 24736912]

# Supporting Information

## **Vertically Aligned and Ordered Arrays of 2D MCo<sub>2</sub>S<sub>4</sub>@Metal with Ultrafast Ion/Electron Transport for Thickness-Independent Pseudocapacitive Energy Storage**

*Zongbin Hao,<sup>1,2</sup> Xingchen He,<sup>1,2</sup> Hongdou Li,<sup>1,2</sup> Denis Trefilov,<sup>1,2</sup> Yangyang Song,<sup>1,2</sup> Yang Li,<sup>1,2</sup> Xinxin Fu,<sup>1,2</sup> Yushuang Cui,<sup>1,2</sup> Shaochun Tang,<sup>\*1,2</sup> Haixiong Ge,<sup>\*1,2</sup> Yanfeng Chen<sup>2</sup>*

<sup>1</sup> Department of Materials Science and Engineering, Collaborative Innovation Center of Advanced Microstructures, Jiangsu Key Laboratory of Artificial Functional Materials, College of Engineering and Applied Sciences, Nanjing University, Nanjing 210093, P. R. China

<sup>2</sup> National Laboratory of Solid State Microstructures, Nanjing 210093, China.

E-mails: [tangsc@nju.edu.cn](mailto:tangsc@nju.edu.cn) (S.T.) or [haixiong@nju.edu.cn](mailto:haixiong@nju.edu.cn) (H.G.)

## Figure Captions in Supporting Information

**Figure S1.** Illustration of synthesis process of a nickel template.

**Figure S2.** XRD patterns of the typical  $\text{NiCo}_2\text{S}_4@\text{NC}$ -array and the bare NC-array.

**Figure S3.** XPS spectra of the typical 2D  $\text{NiCo}_2\text{S}_4@\text{NC}$ -array electrode.

**Figure S4.** SEM images of  $\text{FeCo}_2\text{S}_4$  nanowires grown on NC-array, (a) top view SEM image, and (b) is local magnification of the selected area.

**Figure S5.** SEM images recorded from a vertical view showing ordered covered columns from the HS-5 and HS-7 samples.

**Figure S6.** Cross-section SEM images of (a) HS-7 and (b) HS-9 samples.

**Figure S7.** Electrochemical performance (a) CV curves and (b) GCD curves of the  $\text{NiCo}_2\text{S}_4@\text{NC}$ -array electrodes obtained with different  $t_R$ . CV curve of bare Ni substrates after acid treatment was provided for comparison.

**Figure S8.** A low-magnification SEM image recorded from a vertical view and EDS elemental mappings of different elements of Ni, Co, and S after 2000 cycles.

**Figure S9.** XPS analysis of the  $\text{NiCo}_2\text{S}_4@\text{NC}$ -array electrode after 2000 cycles.

**Figure S10.** (a) The microscopic morphology of a porous RGO film pressed on a Ni foam. (b) CV curves of the positive and negative electrodes recorded at  $20 \text{ mV s}^{-1}$ .

**Table S1.** Electrochemical performance comparison of our optimized  $\text{NiCo}_2\text{S}_4@\text{NC}$ -array electrode with recently reported  $\text{NiCo}_2\text{S}_4$  arrays.

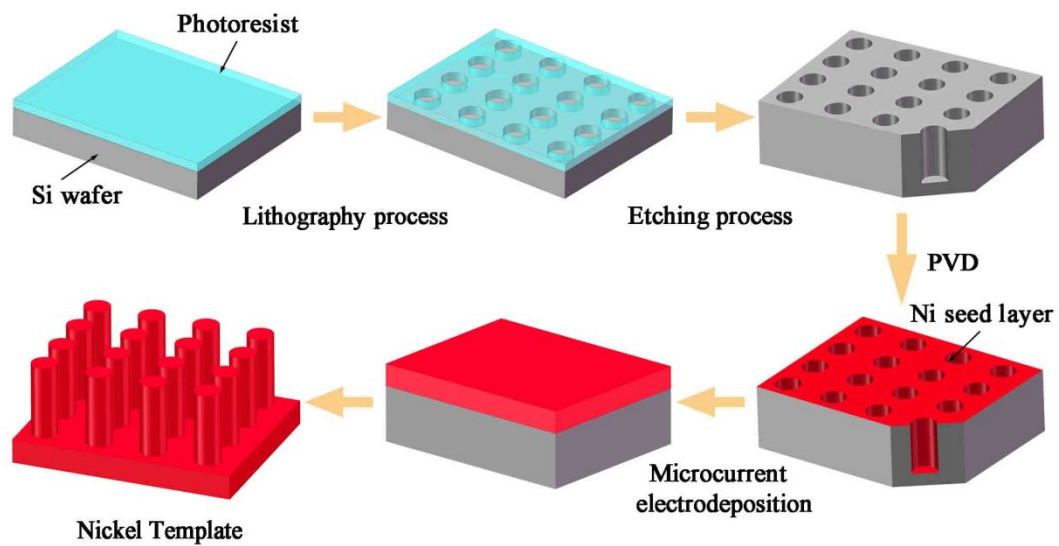

**Figure S1.** Illustration of synthesis process of a nickel template with a periodically ordered Ni column array starting from a Si wafer.

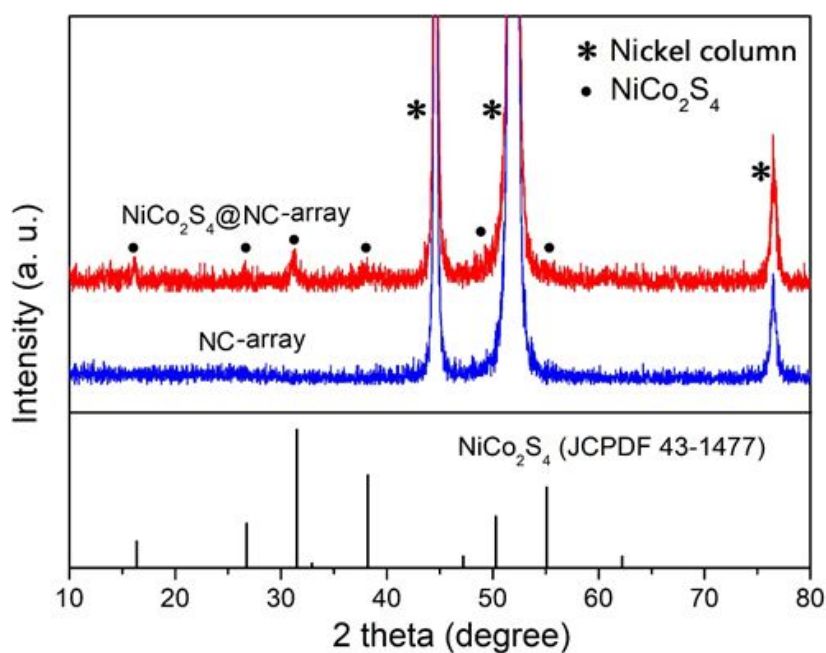

**Figure S2.** XRD patterns of the typical  $\text{NiCo}_2\text{S}_4@\text{NC-array}$  and the bare NC-array.

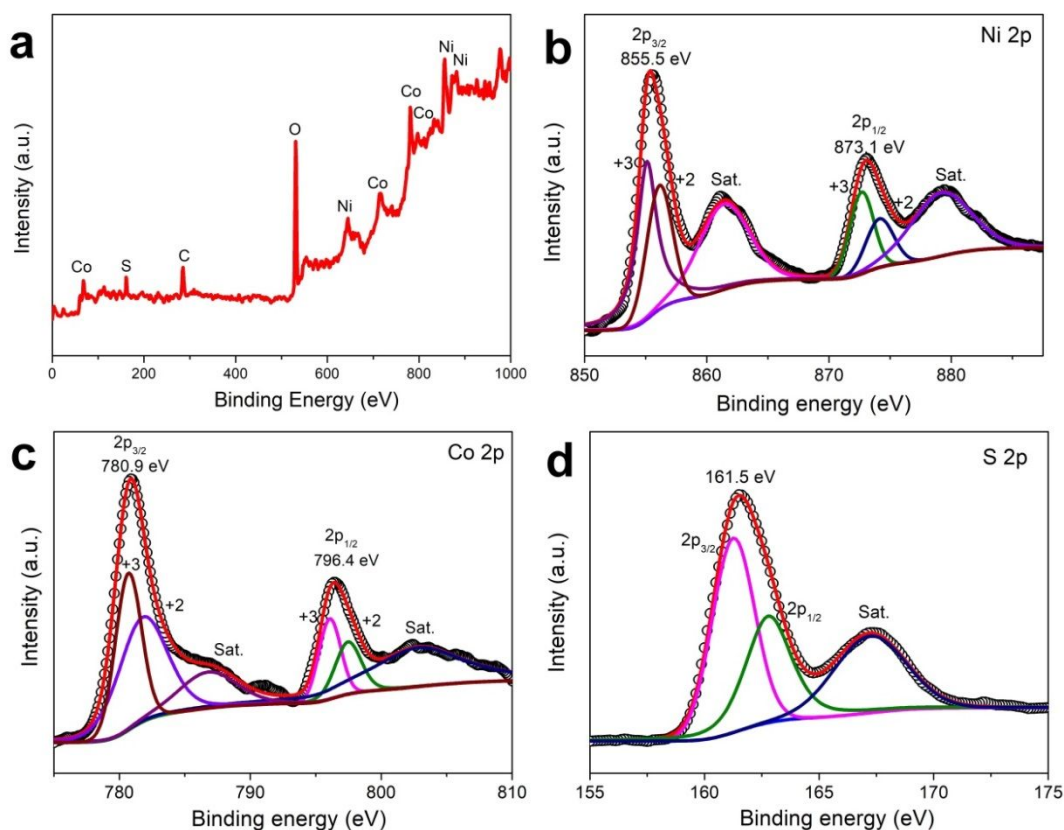

**Figure S3.** XPS spectra of the typical  $\text{NiCo}_2\text{S}_4@\text{NC-array}$  electrode. (a) A survey spectrum, and high-resolution spectra of (b) Ni 2p, (c) Co 2p, and (d) P 2p.

As seen from the X-ray diffraction (XRD) pattern (**Figure S2**), several distinct peaks are observable (comparing with the bare Ni-array). The peaks at  $16.3^{\circ}$ ,  $26.7^{\circ}$ ,  $31.6^{\circ}$ ,  $38.3^{\circ}$ ,  $50.1^{\circ}$ , and  $55^{\circ}$  can be indexed to the (111), (220), (311), (400), (511), and (440) planes of the standard cubic  $\text{NiCo}_2\text{S}_4$  phase (JCPDF No. 43-1477). The other three strong diffraction peaks are corresponding to those of nickel.

The elemental composition and chemical states were characterized by X-ray photoelectron spectra (XPS). The elements of Co, Ni and S can be easily identified through a survey spectrum (**Figure S3a**). Since XPS analysis collects information of several nanometers depth away from the outer surface of samples, it provided the element information from the surface active materials. The XPS results show that the surface element ratio is close to 1:2:4, which is consistent with the SEM-EDS result. Three kinds of elements were fitted using a Gaussian fitting method. Two significant peaks at binding energies of 855.5 and 873.1 eV are assigned to the  $\text{Ni } 2p_{3/2}$  and  $\text{Ni } 2p_{1/2}$ , corresponding to the  $\text{Ni}^{2+}$  and  $\text{Ni}^{3+}$  (**Figure S3b**), accompanied by two shakeup satellites (indicated as “Sat”). From the  $\text{Co } 2p$  spectrum, binding energies of 780.9 eV and 796.4 eV correspond to  $\text{Co } 2p_{3/2}$  and  $\text{Co } 2p_{1/2}$ , which can be assigned to the signals of  $\text{Co}^{2+}$  and  $\text{Co}^{3+}$  (**Figure S3c**). In the  $\text{S } 2p$  spectrum, the peaks at 161.3 eV and 162.8 eV correspond to the  $\text{S } 2p_{3/2}$  and  $\text{S } 2p_{1/2}$ , and the peak at 167.4 eV is assigned as a shakeup satellite (**Figure S3d**). In a brief, the near-surface of the resulting nanosheet-covered array is comprised of  $\text{Ni}^{2+}/\text{Ni}^{3+}$ ,  $\text{Co}^{2+}/\text{Co}^{3+}$ , and  $\text{S}^{2-}$ , which further demonstrates the generation of  $\text{NiCo}_2\text{S}_4$  on NC-array. The XPS result is consistent with those from the XRD and TEM analysis.

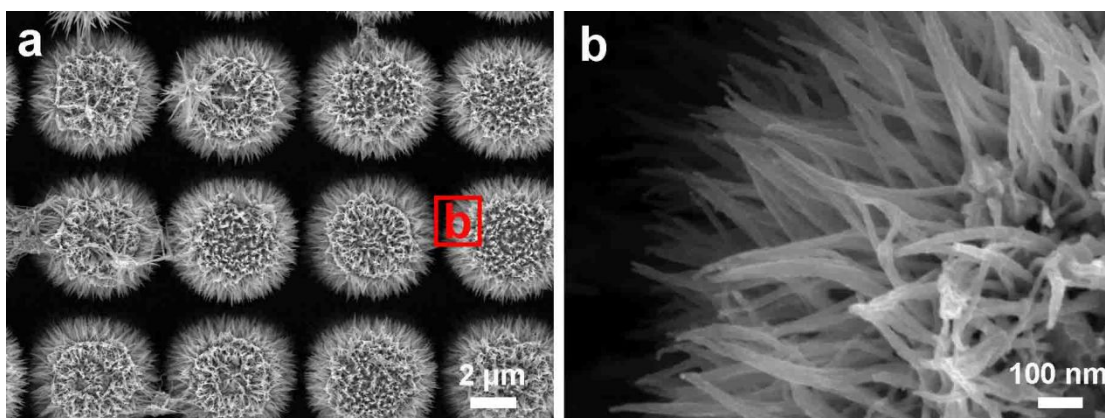

**Figure S4.** SEM images of  $\text{FeCo}_2\text{S}_4$  nanowires grown on NC-array, (a) top view SEM image, and (b) is local magnification of the selected area.

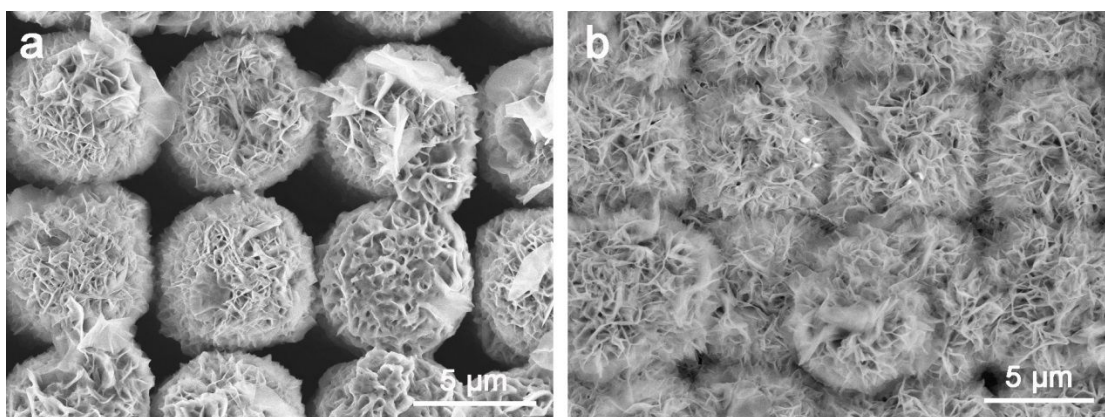

**Figure S5.** SEM images recorded from a vertical view showing ordered covered columns from the HS-5 and HS-7 samples.

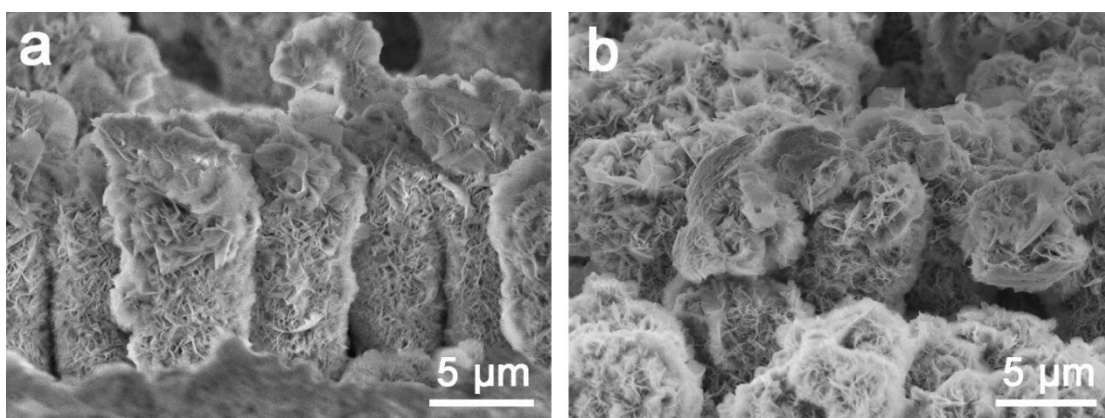

**Figure S6.** Cross-section SEM images of (a) HS-7 and (b) HS-9 samples.

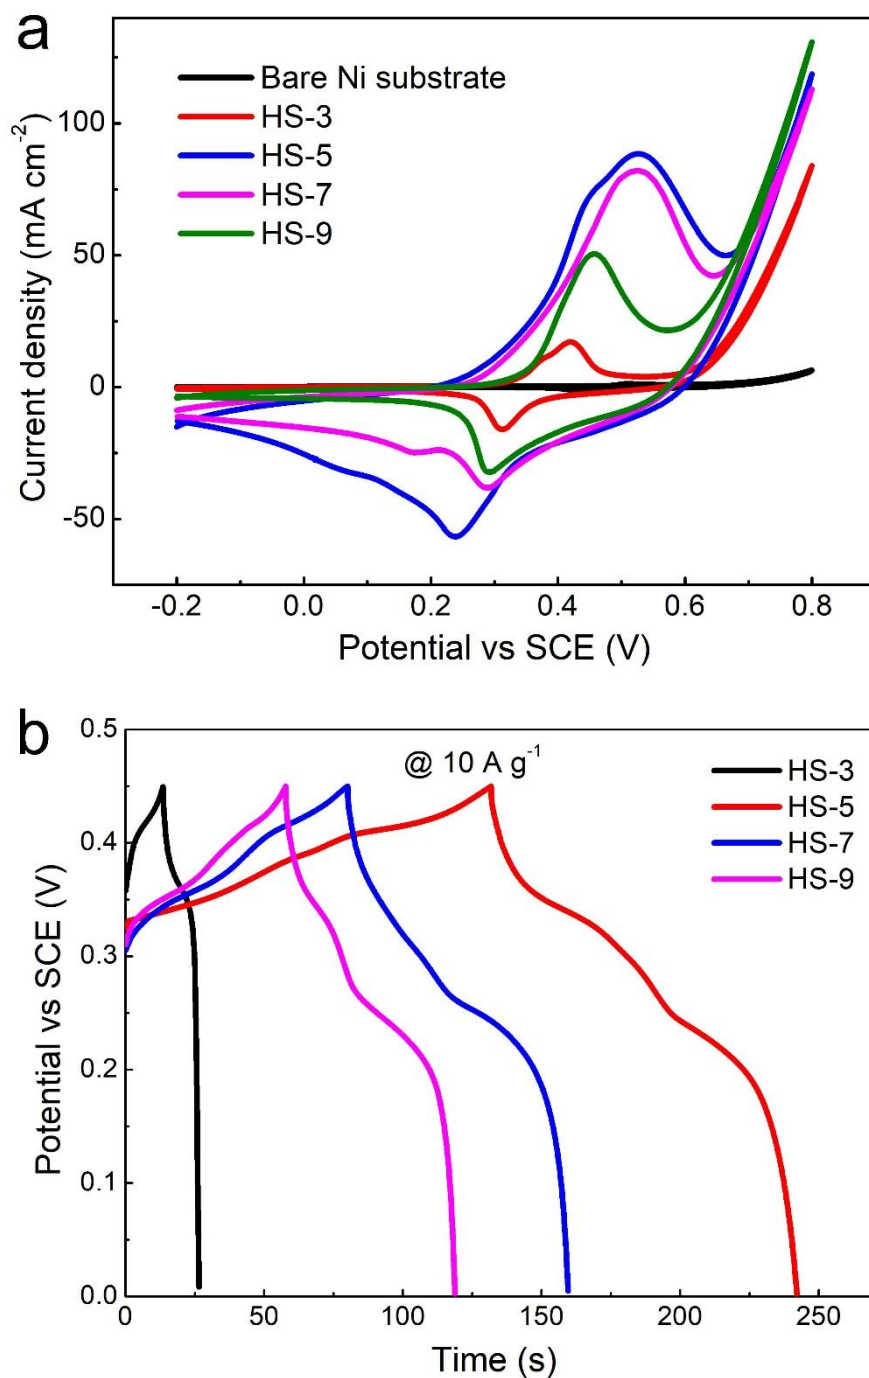

**Figure S7.** Electrochemical performance measurement results (a) CV curves of the  $\text{NiCo}_2\text{S}_4@\text{NC}$ -array electrodes obtained with different  $t_R$  of 3, 5, 7, and 9 h (corresponding to the HS-3, HS-5, HS-7, and HS-9 samples, respectively). CV curve of bare Ni substrates after acid treatment was provided for comparison. (b) GCD curves of the HS-3, HS-5, HS-7, and HS-9 samples, respectively).



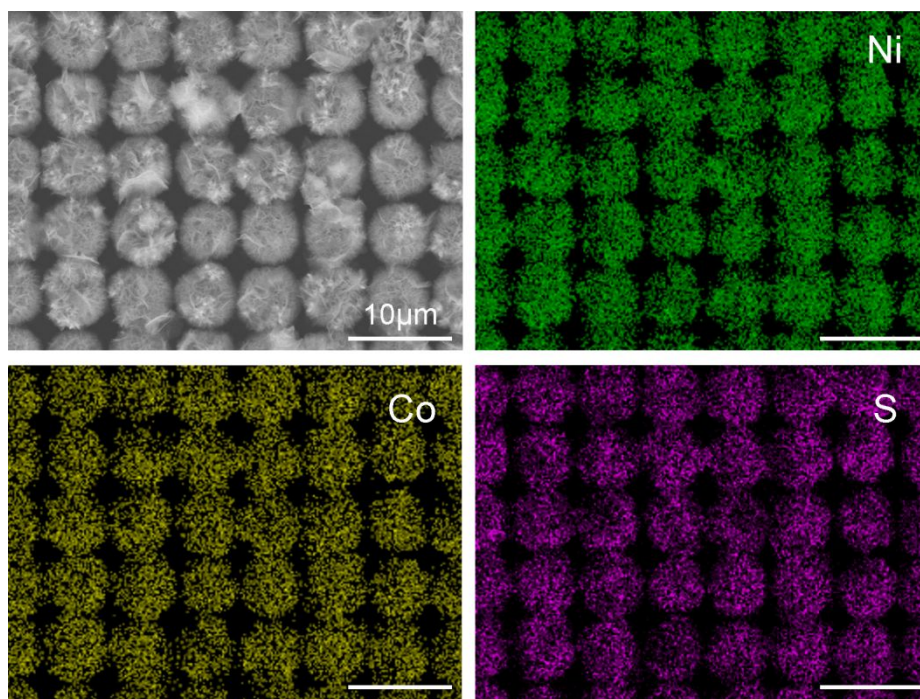

**Figure S8.** A low-magnification SEM image recorded from a vertical view and EDS elemental mappings of different elements of Ni, Co, and S after 2000 cycles.

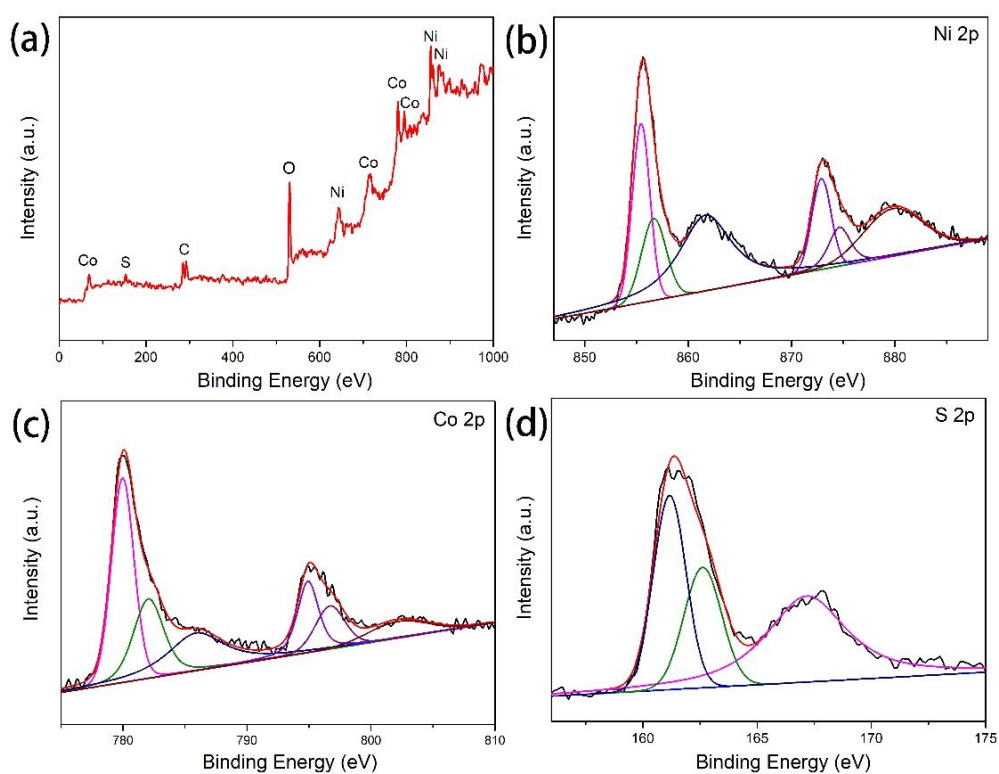

**Figure S9.** XPS analysis of the  $\text{NiCo}_2\text{S}_4@\text{NC}$ -array electrode after 2000 charge-discharge cycles (a) A survey spectrum, and high-resolution spectra of (b) Ni 2p, (c) Co 2p, and (d) S 2p, respectively.



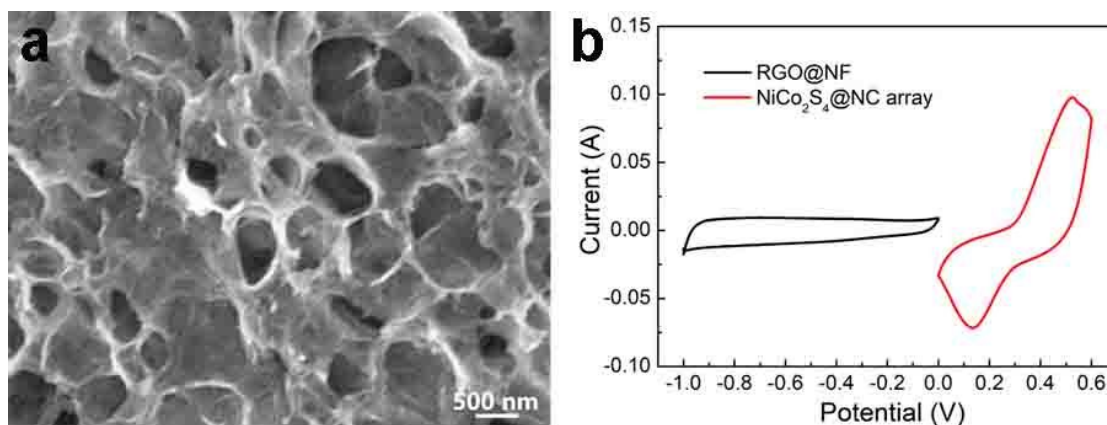

**Figure S10.** (a) The microscopic morphology of a porous RGO pressed on a Ni foam. (b) CV curves of the positive and negative electrodes recorded at 20 mV s<sup>-1</sup>.

**Table S1.** Electrochemical performance comparison of our optimized NiCo<sub>2</sub>S<sub>4</sub>@NC-array electrode with recently reported NiCo<sub>2</sub>S<sub>4</sub> arrays.

| Materials                                              | Electrolyte | Potential window | Specific Capacity                              | Rate Capability                                  | Ref.      |
|--------------------------------------------------------|-------------|------------------|------------------------------------------------|--------------------------------------------------|-----------|
| Ni <sub>x</sub> Co <sub>3-x</sub> Py Porous Nanowires  | 3 M KOH     | 0-0.5 V          | 469 mAh g <sup>-1</sup> at 2 A g <sup>-1</sup> | 427 mAh g <sup>-1</sup> (20 A g <sup>-1</sup> )  | 44        |
| CoNi <sub>2</sub> S <sub>4</sub> nanosheets            | 2 M KOH     | -0.1-0.65V       | 258 mAh g <sup>-1</sup> at 1 A g <sup>-1</sup> | 234 mAh g <sup>-1</sup> (20 A g <sup>-1</sup> )  | 54        |
| CNTs@Ni-Co-S nanosheet core/shell arrays               | 2 M KOH     | -0.2-0.6 V       | 222 mAh g <sup>-1</sup> at 4 A g <sup>-1</sup> | 106 mAh g <sup>-1</sup> (50 A g <sup>-1</sup> )  | 55        |
| Ni-Co-P                                                | 2 M KOH     | 0-0.8 V          | 194 mAh g <sup>-1</sup> at 1 A g <sup>-1</sup> | -                                                | 56        |
| Petal-like Ni-Co-S nanosheet                           | 1 M KOH     | -0.2-0.6V        | 405 mAh g <sup>-1</sup> at 1 A g <sup>-1</sup> | 328 mAh g <sup>-1</sup> (10 A g <sup>-1</sup> )  | 57        |
| NiCo <sub>2</sub> S <sub>4</sub> flaky arrays          | 6M KOH      | -0.1-0.5 V       | 284 mAh g <sup>-1</sup> at 1 A g <sup>-1</sup> | 145 mAh g <sup>-1</sup> (8 A g <sup>-1</sup> )   | 58        |
| NiCo <sub>2</sub> S <sub>4</sub> nanosheet on graphene | 2 M KOH     | 0-0.5 V          | 202 mAh g <sup>-1</sup> at 3 A g <sup>-1</sup> | 106 mAh g <sup>-1</sup> (20 A g <sup>-1</sup> )  | 59        |
| NiCo <sub>2</sub> S <sub>4</sub> @NC array             | 3 M KOH     | 0-0.45 V         | 487 mAh g <sup>-1</sup> at 1 A g <sup>-1</sup> | 150 mAh g <sup>-1</sup> (100 A g <sup>-1</sup> ) | This work |
